# Supplementary material
Source: PubMed Central journal article supplement (PMC152247)

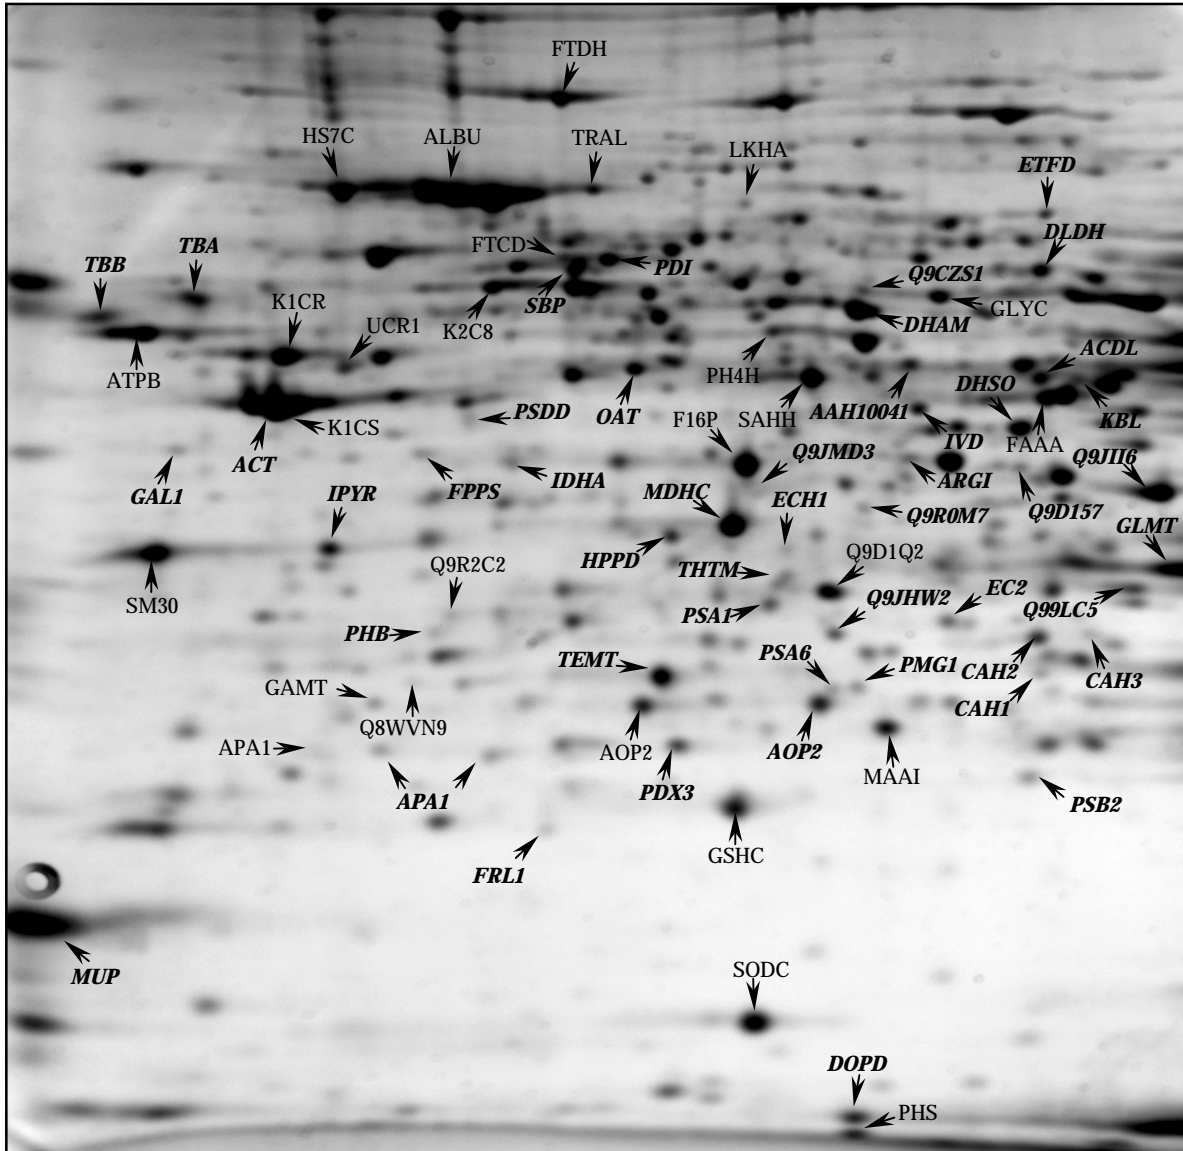

Supplement: pnas_0536625100_2.pdf [file pnas_0536625100_2.pdf]

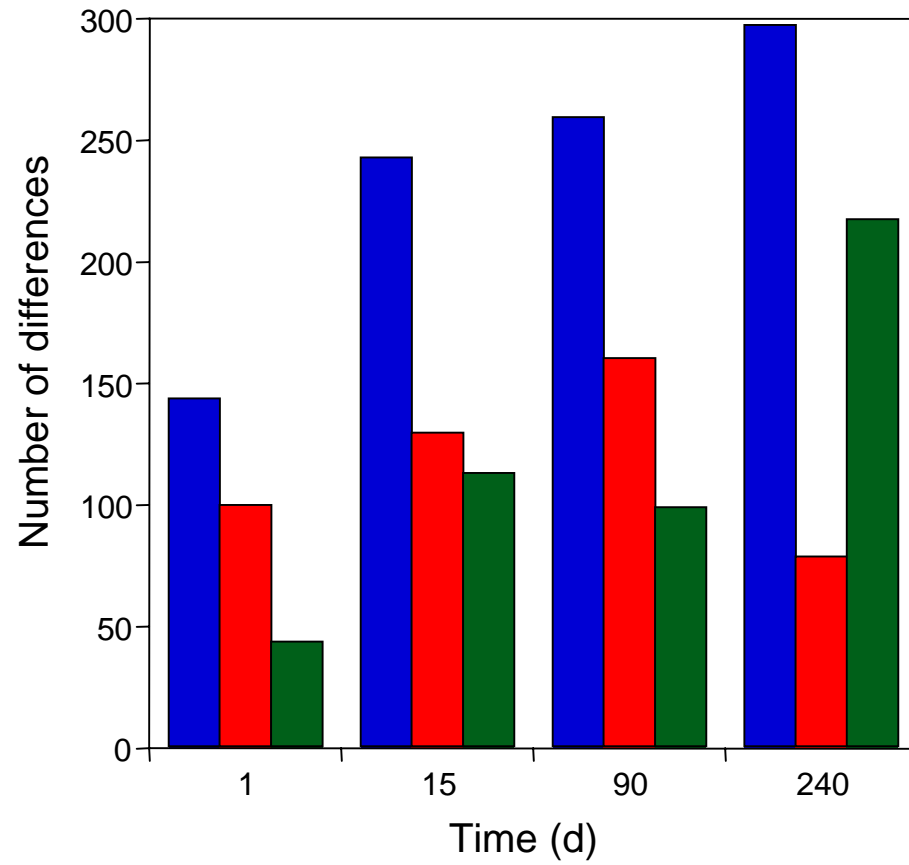

Supplement: pnas_0536625100_4.pdf [file pnas_0536625100_4.pdf]

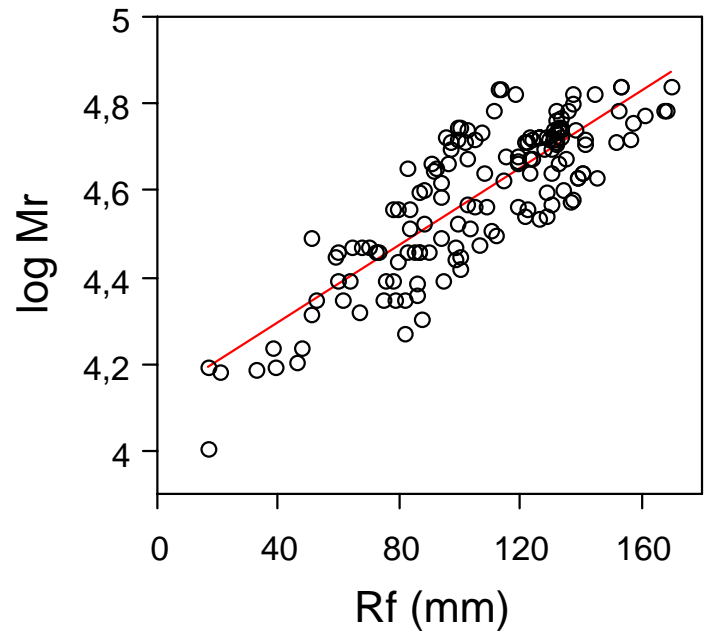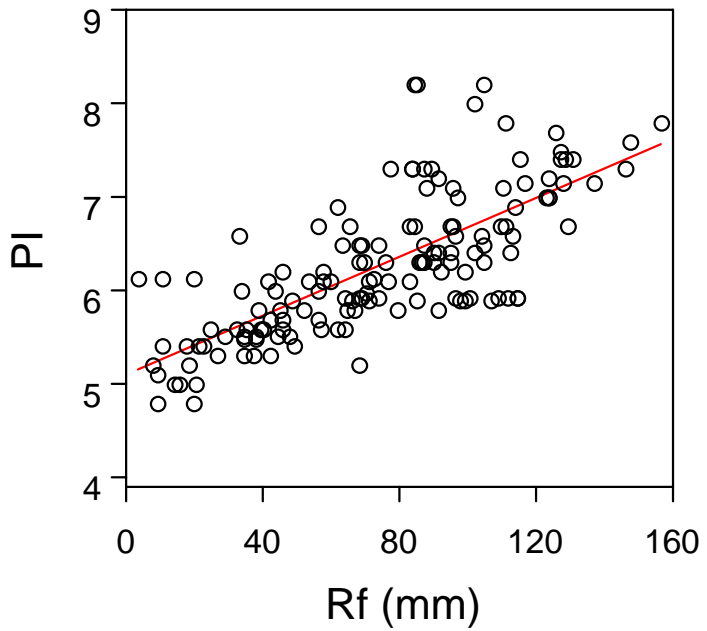

Supplement: pnas_0536625100_7.pdf [file pnas_0536625100_7.pdf]

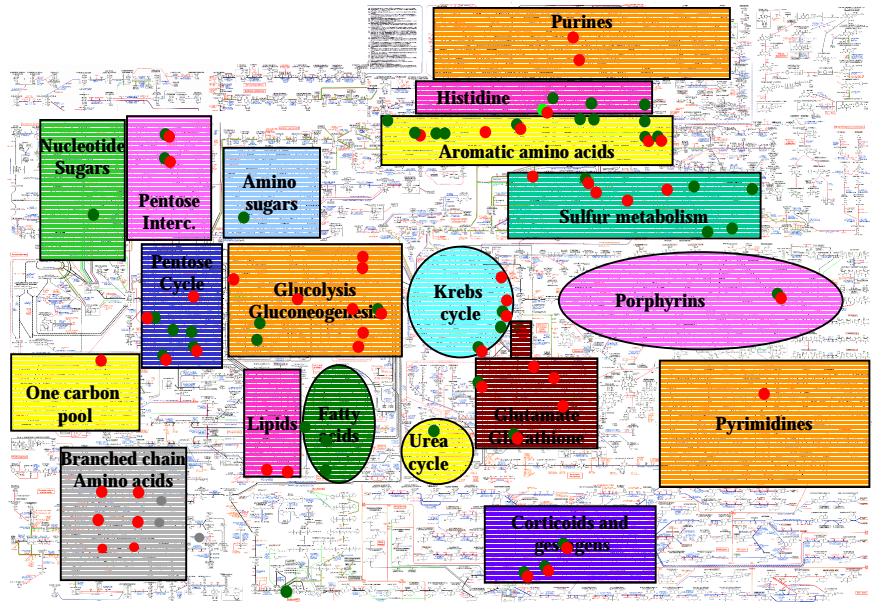

Supplement: pnas_0536625100_9.pdf [file pnas_0536625100_9.pdf]
